# Safety and tolerability of intravenous liposomal GM1 in patients with Parkinson disease: A single center open-label clinical phase I trial (NEON trial)

1 Stefan Halbherr<sup>1</sup>, Stefanie Lerch<sup>1,2</sup>, Sebastian Bellwald<sup>3</sup>, Petra Polakova<sup>1,4</sup>, Bettina Bannert<sup>5</sup>, Marie  
2 Roumet<sup>6</sup>, Roch-Philippe Charles<sup>1,7</sup>, Martin A. Walter<sup>8</sup>, Corrado Bernasconi<sup>9</sup>, Camille Peitsch<sup>1</sup>, Pascal C.  
3 Baumgartner<sup>1</sup>, Céline Kaufmann<sup>1</sup>, Heinrich P. Mattle<sup>10</sup>, Alain Kaelin-Lang<sup>11</sup>, Andreas Hartmann<sup>12</sup>,  
4 Michael Schuepbach<sup>3\*</sup>

5

6 1 InnoMedica Schweiz AG, Switzerland  
7 2 Skin and Soft Tissue Research Center, University Children's Hospital Zurich, Switzerland  
8 3 Institute of Neurology, Konolfingen, Switzerland  
9 4 Swiss pediatric oncology group, Bern, Switzerland  
10 5 Department of Clinical Research, University of Basel, Switzerland  
11 6 Department of Clinical Research, University of Bern, Switzerland  
12 7 Swiss Group for Clinical Cancer Research, Switzerland  
13 8 St. Anna Hospital, University of Lucerne, Switzerland  
14 9 Limites Medical Research Ltd., Vacallo, Switzerland – ORCID 0000-0002-1019-5468  
15 10 University of Bern, Switzerland, ORCID 0000-0001-7968-1731  
16 11 Ente Ospedaliero Cantonale, Lugano Switzerland  
17 12 Assistance-Publique Hôpitaux de Paris, Groupe Hospitalier Pitié-Salpêtrière, Département de Neurologie, Paris, France

18

19 **Revision date: 16.08.2024**

20 **Revised word count: 6288**

21 \*corresponding Author

22 E-mail: [nik@hin.ch](mailto:nik@hin.ch)

23 Participating Center: Institute of Neurology, Konolfingen, Switzerland

24 Safety re-assessment: Clinical Trial Unit, Department of Clinical Research, University of Basel

25 Database programming & Statistical Analysis: Clinical Trial Unit, University of Bern

26 Data and Safety Monitoring Board (DSMB): Andreas Hartmann, Alain Kaelin-Lang, Heinrich Mattle  
NOTE: This preprint reports new research that has not been certified by peer review and should not be used to guide clinical practice.

27 Data access and responsibility: InnoMedica Schweiz AG

## 28 **ABSTRACT**

### 29 **Background:**

30 Parkinson disease (PD) is a chronic progressive neurodegenerative disorder leading to motor and non-  
31 motor impairment often resulting in severe loss of quality of life. There are symptomatic treatments  
32 without effect on the progression of PD. A disease-modifying treatment that could ideally stop the  
33 neurodegenerative process is direly needed. Monosialotetrahexosylganglioside (GM1) is a promising  
34 molecule with neuroprotective effects in preclinical models of PD and has yielded encouraging results  
35 in patients with PD in a randomized placebo-controlled trial. Talineuren (TLN) is a liposomal  
36 formulation of GM1 that has been shown to cross the blood-brain barrier in animals. We assessed the  
37 safety and pharmacokinetics of TLN in patients with PD.

### 38 **Methods and Findings**

39 We prospectively enrolled 12 patients with PD into a single-center, open-label phase I trial to assess  
40 the safety and tolerability of weekly infusions with Talineuren. The maximum suitable dose of  
41 Talineuren was determined by dose escalation in three patients. Subsequently, these and nine further  
42 patients received weekly infusions at the maximum suitable dose of Talineuren over two months (1  
43 patient stopped prematurely). All adverse events were continuously assessed as the primary objective  
44 and coded according to the Medical Dictionary for Regulatory Activities (MedDRA®). Clinical  
45 manifestations of PD were assessed as secondary outcomes using the Movement Disorders Society  
46 Unified Parkinson's Disease Rating Scale (MDS-UPDRS) including a levodopa challenge test at baseline  
47 and end. In addition to weekly history taking, scales to measure mood, behaviour, quality of life,  
48 sleepiness, non-motor symptoms of PD, and cognition were used. Dose escalation identified a  
49 maximum suitable weekly dose of 720 mg. Overall, 304, mostly mild adverse events occurred. Twenty-  
50 three were considered related to the study treatment. Very mild to severe acute infusion reactions at  
51 the 2nd, 3rd, or 4th administration of TLN within the first minutes of the infusion occurred in seven  
52 patients. All reported back or neck pain. Other acute infusion reactions were urticaria, plethora,

53 nausea, and chest pain. These adverse reactions disappeared within minutes of stopping the infusion  
54 and did not recur when Talineuren administration was resumed at a very low rate. Beyond the 4th  
55 administration, infusions could be given at increased rates up to 370 ml/h and no acute reaction  
56 occurred anymore. The mechanism of this acute infusion reaction remains unclear. Some patients  
57 reported mild dizziness for a few hours after Talineuren following many but not all administrations  
58 throughout the study. Non-motor symptoms of PD, motor parkinsonian signs off medication, and  
59 quality of life improved significantly during the treatment phase, including the MDS-UPDRS total score  
60 (mean decrease  $11.09 \pm 10.47$  points;  $p=0.006$ ) and the PDQ-39 summary index (mean decrease  
61  $2.91 \pm 2.25$  points,  $p=0.002$ ). Dopaminergic medications remained stable during the study.

## 62 **Conclusion:**

63 Talineuren is safe and well-tolerated in general. This prospective phase I trial revealed non-allergic  
64 habituating acute infusion reactions at the 2nd, 3rd, or 4th treatment that can be prevented by a  
65 slower rate of infusion. Importantly, the exploratory results suggest a consistent improvement of signs  
66 and symptoms of PD.

67 **Abstract word count:** 487

68 **Trial Registration:** The NEON trial is registered at the US National Institutes of Health  
69 (ClinicalTrials.gov) #NCT04976127 and in the Swiss National Clinical Trials Portal (SNCTP000004631)

70 **Funding:** NEON was fully funded by InnoMedica Switzerland AG.

## 71 **Introduction**

72 Parkinson disease (PD) is a chronic progressive neurodegenerative disorder with motor signs and non-  
73 motor symptoms. Its clinical hallmark is Parkinsonism, i.e., bradykinesia associated with rest tremor  
74 or rigidity (1). Although the motor signs remain the primary defining feature of PD, vegetative,  
75 behavioural, and cognitive symptoms may have a predominant effect on quality of life, and often  
76 precede motor signs (2). Histologically, PD is characterized by alpha-synuclein containing neuronal  
77 inclusions called Lewy bodies that propagate through the brain resulting in impaired function of  
78 numerous systems (3,4). Some manifestations of PD can symptomatically be relieved with medication  
79 or stereotactic procedures, but despite considerable ongoing research efforts (5), there is currently  
80 no known disease-modifying treatment available for PD. The most important therapeutic potential  
81 currently consists of medications for the substitution of dopamine loss due to degeneration of  
82 dopaminergic neurons in the substantia nigra. However, over decades of disease progression  
83 levodopa-resistant symptoms become the main cause for disability. A treatment to slow down or even  
84 halt the pathological process in PD is direly needed.

85 The glycosphingolipid GM1 (monosialotetrahexosylganglioside) is an important component of the cell  
86 membrane of neurons that is diminished in patients with PD (6). GM1 has shown neurotrophic and  
87 neuroprotective properties in preclinical research (7), and decreased levels of GM1 in patients with  
88 PD may contribute to the pathogenesis (8). Studies in animal models of PD have shown recovery with  
89 GM1 treatment (9), and a randomized double-blinded placebo-controlled clinical study in 77 patients  
90 treated with twice daily subcutaneous administration of 100 mg GM1 resulted in a significant benefit  
91 compared to placebo over 120 weeks (10) Administration and therapeutic effects of GM1 may be  
92 improved by using a neurotropic nanoparticle carrier. Talineuren (TLN) is a liposomal formulation  
93 consisting of the active pharmaceutical ingredient (API) GM1 at 6 mg/ml and the carrier liposomes  
94 consisting of sphingomyelin and cholesterol. We conducted a phase I safety trial in 12 PD patients  
95 receiving weekly TLN infusions over 8 weeks minimum.

## 96 **Methods**

### 97 **Study Design**

98 In this single-centre, open-label phase I interventional trial we enrolled 12 patients with PD to assess  
99 the safety, tolerability, and preliminary efficacy of liposomal GM1 as add-on medication with weekly  
100 intravenous infusions. Three patients received weekly ascending doses for 14 weeks to establish the  
101 highest well-tolerated dose (dose escalation group [DE]). The highest tested weekly dose of the API  
102 was 720 mg based on previous use of GM1 in humans (11) and was reached in all three patients. DE  
103 patients and 9 additional patients (dose consolidation group [DC]) received thereafter weekly TLN with  
104 an API dose of 720 mg for 8 weeks between December 13, 2021 and June 20, 2022. One of these  
105 patients stopped participation prematurely. One month after the last administration of TLN, a final  
106 safety follow-up visit was performed. Antiparkinsonian medication was kept stable if possible. In two  
107 patients with bilateral subthalamic nucleus stimulation, stimulation remained on and parameters  
108 unchanged throughout the study.

109 An independent data safety monitoring board (DSMB) evaluated safety data when the 3 DE patients  
110 had reached a GM1 dose of 180 mg and after completion of the dose escalation. The trial was  
111 approved by the local ethics committee (Kantonale Ethikkommission Bern) and the competent  
112 authority October 30, 2021. The trial is registered at the US National Institute for Health  
113 (ClinicalTrials.gov NCT04976127). The trial was conducted according to the principles of the  
114 Declaration of Helsinki and Good Clinical Practice guidelines. Talineuren is provided by the  
115 manufacturer and sponsor of the study, InnoMedica Switzerland AG. Talineuren is produced under  
116 GMP conditions at InnoMedica's Nanofactory in Marly (Freiburg, Switzerland).

### 117 **Patients**

118 Patients aged 40-80 years were eligible if they were diagnosed with PD according to British brain bank  
119 criteria (12), had a Hoehn and Yahr Stage 0 – 2.5 on medication (13) and stable PD treatment for at  
120 least 4 weeks. To exclude major cognitive deficits, a score >25 on the Montreal Cognitive Assessment

121 (14) was required. Patients were carefully selected to exclude medical, psychological, and behavioural  
122 problems that may have interfered with their compliance for study participation. Patients provided  
123 written informed consent and fulfilled all eligibility criteria.

## 124 **Dose escalation (DE)**

125 In patients 1-3 dose escalation was started at 6 mg GM1 and then increased weekly to 12 mg, 60 mg,  
126 followed by increases of 60 mg/week up to 720 mg. TLN was provided as a concentrated liposomal  
127 suspension containing cholesterol, sphingomyelin, and the active pharmaceutical ingredient GM1 in  
128 30ml vials (180 mg GM1) in a phosphate buffered solution. Talineuren was diluted in phosphate  
129 buffered saline with a final concentration of 6 mg/ml GM1. TLN was added to 250 ml NaCl 0.9% and  
130 administered with 250 ml/h with a perfusor. The speed of infusion could be increased up to 370 ml/h  
131 if tolerated but reduced if necessary. Three days after the infusion each weekly dose increase of the  
132 TLN had to be cleared by an internal safety monitoring committee (MS, RPC, MW) by assessing clinical  
133 symptoms and lab values (Appendix 1). The second and third patient could start with the lowest dose  
134 with a delay of 1 week after confirmation of safety in the first patient. This 1+2 schedule was  
135 maintained for each weekly increase to allow for modification of the increasing of doses if needed  
136 according to a predefined dose modification matrix. All 3 patients had two clinical and lab assessments  
137 each week during the 14 weeks of the dose escalation phase. The average of the three maximal  
138 tolerated doses was defined as maximal suitable dose (MSD) for the dose consolidation (DC) part of  
139 the trial.

## 140 **Dose consolidation (DC)**

141 After DE, the initial 3 and additional 9 patients received weekly infusions of TLN with an API dose of  
142 720 mg and clinical and lab safety assessments over 8 weeks except for one patient who stopped  
143 participation early. A final safety assessment was performed one month after the last administration  
144 of TLN.

## 145 **Pharmacokinetics**

146 Pharmacokinetic parameters were determined for GM1 from individual concentration time profiles  
147 obtained after the first intravenous infusion administration of 720 mg GM1 in the 9 DC patients. Blood  
148 samples were drawn before the infusion started and after the start of the infusion (250 ml/h, 370 ml  
149 total volume) at 5 minutes, 1 hour, 4, 8, 24, 48, 72, and 96 hours. Samples were immediately  
150 centrifuged and frozen at -70°C. GM1 concentration was measured using liquid chromatography with  
151 tandem mass spectrometry.

152 Noncompartmental pharmacokinetic analysis was performed using Phoenix WinNonlin version 8.0  
153 [Pharsight Corporation, Mountain View, CA, USA] using the intravenous infusion dosing option.

154 Pharmacokinetic variables were estimated from the plasma concentration versus time curves:  $t_{\max}$   
155 (time to reach the maximum plasma concentration read directly from the plasma concentration-time  
156 curve),  $C_{\max}$  (maximum plasma concentration read directly from the plasma concentration-time  
157 curve),  $AUC_{0-\infty}$  (area under the plasma concentration-time curve from time point zero to infinity,  
158 estimated from  $AUC_{0-t} + C_t/\lambda_z$ , where t is the last sampling time with a concentration above the limit  
159 of quantification and  $\lambda_z$  is the terminal elimination rate constant, estimated by log-linear least squares  
160 regression of the plasma concentration versus time data in the terminal phase;  $AUC_{0-\infty}$  was calculated  
161 according to the linear trapezoidal with linear/log interpolation rule),  $t_{1/2}$ : (apparent terminal half-life  
162 calculated as  $\ln 2/\lambda_z$ ), CL: (apparent clearance calculated as dose divided by  $AUC_{0-\infty}$ ),  $V_z$  (apparent  
163 volume of distribution calculated as dose divided by  $\lambda_z * AUC_{0-\infty}$ ).

## 164 **Outcome measures**

165 The primary outcome was safety defined as the occurrence of adverse events. Safety assessments  
166 included a full medical history at baseline, a full general physical medical and neurological examination  
167 at baseline, a final assessment and last follow-up, and detailed unstructured interviews at each visit  
168 and if needed by phone. A narrative description of adverse events and their duration, intensity,  
169 seriousness, and relation to TLN were recorded by the site investigators. Adverse events were coded  
170 by an independent expert with the Medical Dictionary for Regulatory Activities (MedDRA®).

171 Adverse events were considered unrelated to TLN if a plausible other explanation for the observation  
172 was available. Otherwise, adverse events without plausible causal relation to TLN but lacking a  
173 different explanation were considered to be unlikely related to TLN. Safety data were weekly reviewed  
174 by an internal safety board (MS, RPC, MAW) during the dose escalation period. Any out-of-range  
175 laboratory result was counted as an adverse event.

176 Parkinsonian motor signs and non-motor symptoms were further explored weekly using the  
177 Movement Disorders Society-Unified Parkinson’s Disease Rating Scale (MDS-UPDRS) (15) parts 1 (non-  
178 motor experiences of daily living), 2 (motor experiences of daily living), 3 (motor examination), and 4  
179 (motor complications). The MDS-UPDRS-2 was assessed for best and worst condition in the preceding  
180 week in patients with motor fluctuations. The MDS-UPDRS-3 was assessed before and after each  
181 administration of TLN and also at baseline and final assessment in a levodopa challenge test (LCT). For  
182 the LCT patients paused their dopaminergic medications for at least 12 hours before the assessment  
183 “off” medication. The usual morning dose of levodopa equivalence plus 50 mg levodopa was then  
184 given as liquid formulation of levodopa/benserazide (in 1 patient levodopa/carbidopa) for the ensuing  
185 assessment “on” medication. Levodopa equivalent daily doses were noted weekly and calculated  
186 according to standard procedures (16). The number of PD-related non-motor symptoms was assessed  
187 with the Non-Motor Symptoms Questionnaire (NMSQuest) (17) at baseline and weekly during the  
188 course of the trial. Questionnaires at baseline and final assessment included the Parkinson’s disease  
189 Questionnaire-39 (PDQ-39) (18) for disease-related quality of life, the Epworth Sleepiness Scale (19),  
190 the Montreal Cognitive Assessment (MoCA) (20) for mental performance, the Beck Depression  
191 Inventory (BDI) (21) to assess mood, and the Starkstein Apathy Scale (22).

## 192 **Statistical analysis**

193 After completion of data entry, data validation and cleaning were performed. Data analysis was  
194 started. All patients enrolled in this study received at least one dose of study medication and were  
195 considered in the safety and tolerability analysis.



196 PK analysis plasma concentrations and PK parameters were analyzed for the 9 patients of the  
197 consolidation group and reported in a descriptive fashion. Descriptive statistics include arithmetic  
198 mean, SD, minimum, median, maximum, geometric mean, and coefficient of variation of arithmetic  
199 and geometric means.

200

201 Other study outcomes including scores measuring the Parkinsonian motor signs and non-motor  
202 symptoms, disease related quality of life, levodopa equivalent daily dose, and mental performance  
203 were assessed in the 11 patients who received at least two full-dose infusions and completed at least  
204 the MDS-UPDRS at these two visits. For patients included in the escalation part we used as baseline  
205 value the values assessed at the start of the trial (i.e. before the start of the escalation part).

206 We used summary statistics to describe the outcomes values at baseline, after 8 weeks of treatment,  
207 and the observed changes. For each outcome, the significance of the change from baseline was  
208 assessed using a paired Wilcoxon signed-rank test. No correction for multiplicity was applied.

209 Few outcomes including the blood lab values of cholesterol (total, LDL, HDL, ratio total/HDL),  
210 triglycerides, and apolipoprotein B were defined, post-hoc, as additional outcomes. For these  
211 outcomes, we used summary statistics to describe the weekly assessed values. At each time point, the  
212 significance of the change from baseline was assessed using a paired Wilcoxon signed-rank test.

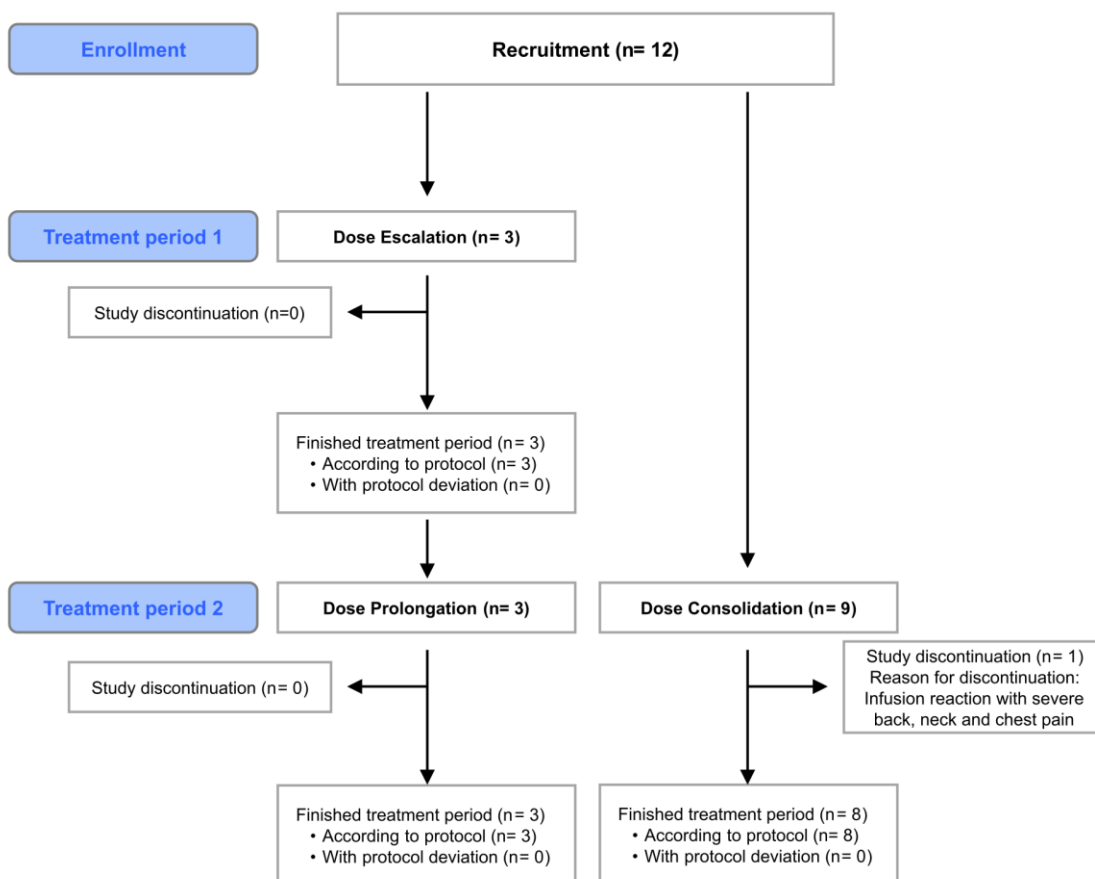

213

214 **Fig 1: CONSORT diagram of dose escalation group (with prolongation) and dose consolidation group.**

## 215 Results

### 216 Trial population

217 There were no screening failures. Twelve patients (including three women) were recruited. At  
 218 inclusion the median age was 65 (range 46-75) years old and had had motor parkinsonian signs for  
 219  $7.9 \pm 5.2$  (range 2-19, median 6.5) years. Three patients had only akinetic-rigid signs and nine patients  
 220 also rest tremor. All patients had been clinically diagnosed with PD. For the patient characteristics see  
 221 Table 1.

222 **Table 1. Patient characteristics.**

| Characteristic                                                | Overall, N = 12       | Dose consolidation, N = 9 | Dose escalation, N = 3 |
|---------------------------------------------------------------|-----------------------|---------------------------|------------------------|
| Age at registration (years)                                   |                       |                           |                        |
| Median (range)                                                | 65.0 (46.0–75.0)      | 65.0 (51.0–75.0)          | 63.0 (46.0–68.0)       |
| Sex - Female, n (%)                                           | 3 (25%)               | 2 (22%)                   | 1 (33%)                |
| Height (cm)                                                   |                       |                           |                        |
| Median (range)                                                | 172.0 (159.0–183.0)   | 172.0 (160.0–183.0)       | 174.0 (159.0–182.0)    |
| Weight (kg)                                                   |                       |                           |                        |
| in                                                            | 78.5 (60.0–99.0)      | 78.0 (64.0–99.0)          | 88.0 (60.0–99.0)       |
| BMI (kg/m <sup>2</sup> )                                      |                       |                           |                        |
| Median (range)                                                | 26.2 (21.6–32.7)      | 25.8 (21.6–30.8)          | 26.6 (23.7–32.7)       |
| Hoehn and Yahr stage at screening, n (%)                      |                       |                           |                        |
| Stage 0 (no signs of disease)                                 | 0 (0%)                | 0 (0%)                    | 0 (0%)                 |
| Stage 1 (unilateral involvement only)                         | 3 (25%)               | 2 (22%)                   | 1 (33%)                |
| Stage 1.5 (unilateral and axial involvement)                  | 5 (42%)               | 4 (44%)                   | 1 (33%)                |
| Stage 2 (Bilateral involvement without impairment of balance) | 4 (33%)               | 3 (33%)                   | 1 (33%)                |
| Stage 2.5 (Mild bilateral disease with recovery on pull test) | 0 (0%)                | 0 (0%)                    | 0 (0%)                 |
| Drugs                                                         |                       |                           |                        |
| L-DOPA, n (%)                                                 | 12 (100%)             | 9 (100%)                  | 3 (100%)               |
| Non-ergot-derived dopamine receptor agonist, n (%)            | 8 (67%)               | 6 (67%)                   | 2 (67%)                |
| MAO-B Inhibitor, n (%)                                        | 4 (33%)               | 3 (33%)                   | 1 (33%)                |
| COMT inhibitor, n (%)                                         | 3 (25%)               | 3 (33%)                   | 0 (0%)                 |
| NMDA agonist, n (%)                                           | 1 (8.3%)              | 1 (11%)                   | 0 (0%)                 |
| Other, n (%)                                                  | 1 (8.3%)              | 1 (11%)                   | 0 (0%)                 |
| LEDD (mg)                                                     |                       |                           |                        |
| Median (range)                                                | 650.0 (340.0–1,275.0) | 750.0 (340.0–1,275.0)     | 550.0 (375.0–1,010.0)  |

223

## 224 **Safety**

### 225 *Dose escalation*

226 Weekly dose escalation of TLN from 6 to 720 mg GM1 i.v. at a rate of 250 ml/h was well tolerated  
227 without major adverse effects. Mild neck and lumbar pain occurred for 15 minutes in one patient  
228 during the second (12 mg) and reappeared very mildly for a few minutes during the third (60 mg)  
229 infusion with TLN. Otherwise, dose escalation was unremarkable for all three patients and reached  
230 720 mg with good tolerance. One patient reported transient beneficial effects of TLN treatment on  
231 sleep, mood, and general energy levels during dose escalation lasting longer with increasing doses. At  
232 the end of the dose escalation, the subjective beneficial effects of the weekly infusions lasted almost  
233 a week in this patient.

234

### 235 *Pharmacokinetics*

236 After first intravenous application of TLN with an API dose of 720 mg, repeated blood sampling showed  
237 the plasma peak of TLN in the sample taken 4 hours after start of the infusion in all but one patient in  
238 whom the peak was reached at 1 hour after start of the infusion. This patient was the patient who had  
239 the severe acute infusion reaction at the second administration. Pharmacokinetic variables are given  
240 in Table 2.

241 **Table 2. Pharmacokinetic variables for GM1 after i.v. infusion administration of 720 mg GM1 in the**  
 242 **dose consolidation patients group (n = 9).**

| n=9     | C <sub>BL</sub><br>(ng/ml) | C <sub>max</sub><br>(ug/ml) | t <sub>½</sub><br>(h) | AUC <sub>0-∞</sub><br>(h*ug/ml) | V <sub>z</sub><br>(ml) | CL<br>(ml/h) |
|---------|----------------------------|-----------------------------|-----------------------|---------------------------------|------------------------|--------------|
| Mean    | 52.8                       | 212                         | 15.0                  | 5'011                           | 4'188                  | 210          |
| SD      | 30.8                       | 153                         | 6.48                  | 4'035                           | 2'666                  | 113          |
| Minimum | 0                          | 84                          | 10.2                  | 1'920                           | 2'020                  | 49           |
| Median  | 65.4                       | 147                         | 12.6                  | 3'860                           | 3'290                  | 187          |
| Maximum | 84.5                       | 582                         | 30.7                  | 14'700                          | 10'000                 | 375          |

243 C<sub>BL</sub>: baseline plasma concentration before TLN administration. C<sub>max</sub>: maximum plasma concentration  
 244 read directly from the plasma concentration-time curve. t<sub>½</sub>: apparent terminal half-life. AUC<sub>0-∞</sub>: area  
 245 under the plasma concentration-time curve from time point zero to infinity. V<sub>z</sub>: apparent volume of  
 246 distribution. CL: apparent clearance.

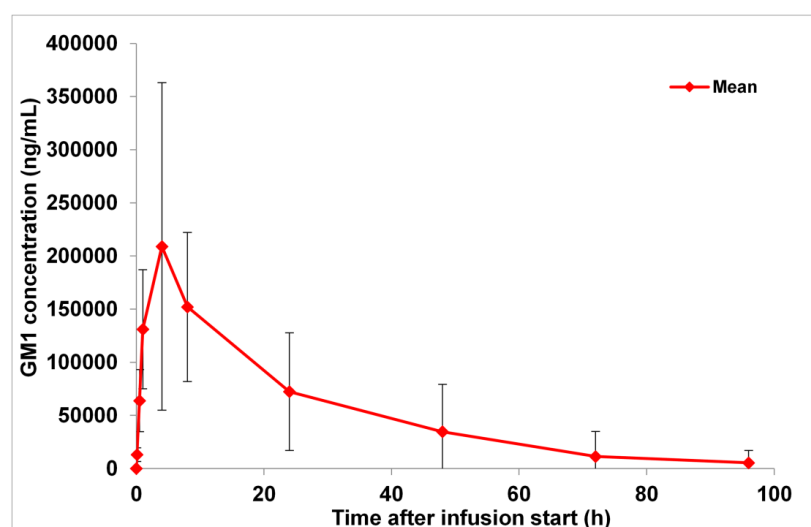

247 **Fig 2. Mean (±SD) GM1 plasma concentration-time profiles after intravenous infusion**  
 248 **administration of 720 mg GM1 (linear).**  
 249

## 250 Dose consolidation

251 During the dose consolidation phase, acute infusion reactions occurred in 6 patients shortly after the  
252 start of the 2<sup>nd</sup> (6 patients), 3<sup>rd</sup> (1 patient), and 4<sup>th</sup> (1 patient) administration of TLN (see below). One  
253 patient with a severe infusion reaction did not receive any further TLN treatment. During all following  
254 treatments with TLN, no acute infusion reactions occurred. The maximum dose of GM1 720 mg/week  
255 could be maintained throughout the study.

## 256 Adverse events

257 Overall, 304, mostly mild adverse events occurred. No serious adverse event was reported in this  
258 study. Twenty-three adverse events were affirmatively related to the study treatment. The causal  
259 relation to the study treatment was considered probable in 17 (all mild), possible in 100, and unlikely  
260 in 123 observations. Forty-one adverse events were unrelated to the study treatment.

261

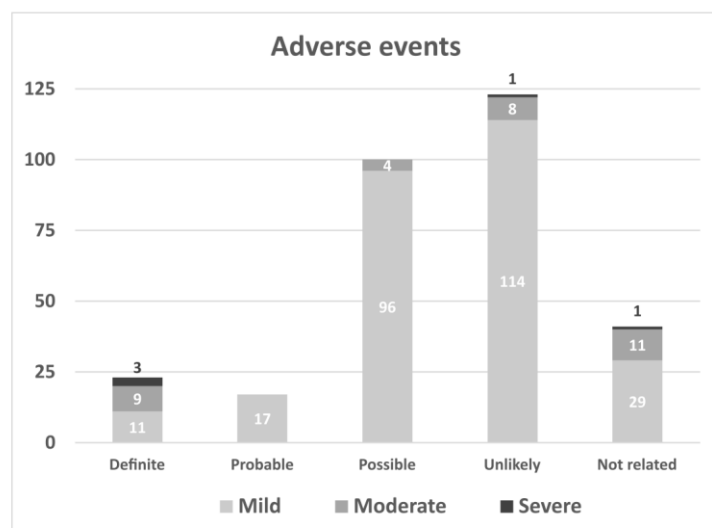

262

263 **Fig 3. Observed adverse events (n = 304) during dose escalation and dose consolidation with**  
264 **Talineuren.**

265 Adverse events definitively or probably related to TLN can be separated into a group of immediate  
266 mild to severe infusion reactions that abated after halting the administration of TLN (see below), and  
267 a group of more diffuse, always mild reactions often occurring with some hours' delay after the TLN  
268 infusion. The latter group comprises mild tension headache (n=3), nausea (n=1), and arterial  
269 hypertension during emotional tension (n=1) during the infusion, and dizziness (n=6), inner tension  
270 and tremulousness (n=2), and tension headache (n=4) occurring within hours after the infusion,  
271 spontaneously remitting within less than a day. One patient suffered from mildly depressed mood  
272 during the withdrawal of TLN after the dose escalation phase, partly because he missed the beneficial  
273 effects of the weekly infusions. This symptom remitted spontaneously before TLN was resumed in the  
274 consolidation phase of the study.

275 Acute infusion reactions occurred in one patient during dose escalation (2<sup>nd</sup> and 3<sup>rd</sup> administration),  
276 and in six patients during dose consolidation, always within minutes of the 2<sup>nd</sup> administration of TLN.  
277 In two patients, an acute infusion reaction was observed at the 3<sup>rd</sup> administration, in one very mildly  
278 during the 4<sup>th</sup> administration. Symptoms occurred after as little as 3 mg of liposomal GM1 was  
279 administered and as early as within 1 minute after start of the infusion. Symptoms built up at variable  
280 speeds and with mild to severe intensity among different patients. All symptoms abated within  
281 minutes after stopping the infusion. Infusion could then be resumed at a low speed (10 ml/h) without  
282 recurrence of symptoms. In most cases, infusion speed could be increased swiftly up to the planned  
283 250 ml/h except in one patient who required several hours for the 2<sup>nd</sup> infusion. However, later the  
284 patient tolerated administrations of TLN at 250 ml/h without any adverse events. In one patient, the  
285 acute infusion reaction at the beginning of the 2<sup>nd</sup> administration quickly led to severe back, neck, and  
286 chest pain. According to the study protocol, the patient had to be removed from the study and could  
287 not be re-exposed at a lower infusion rate despite the patients' explicit request to continue study  
288 participation. The acute infusion reactions (Table 3) included lower back, neck, and chest pain as the  
289 most common symptom; lower back pain was present in all patients with an acute infusion reaction.  
290 Lower back pain was very mild in two patients during three administrations and did not require the

291 infusion to be halted. One patient had itching during 2<sup>nd</sup>, 3<sup>rd</sup>, and 4<sup>th</sup> administration of TLN, and  
 292 urticaria on the trunk and the thighs (Table 3) during the 3<sup>rd</sup> infusion. Tryptase was normal before start  
 293 of TLN and within 30 minutes of the appearance of urticaria. Clemastine 2 mg was given i.v. and TLN  
 294 could be resumed without worsening of symptoms. Urticaria disappeared within a day and did not  
 295 recur during the following administrations of TLN. After the last occurrence of an acute infusion  
 296 reaction, patients received 19 (n=1, dose escalation), 6 (n=4), and 4 (n=1) infusions without  
 297 experiencing an acute infusion reaction. One patient was withdrawn from the study (Figure 1). In the  
 298 remaining 5 patients overall 68 TLN infusions were given without an acute infusion reaction.

299 **Table 3. The number of patients with acute infusion reaction and the presented symptoms early**  
 300 **during the infusion.**

| <b>Acute infusion reaction</b> | <b>2nd administration</b> | <b>3rd administration</b> | <b>4th administration</b> |
|--------------------------------|---------------------------|---------------------------|---------------------------|
| lower back pain                | 7*                        | 2*                        | 1                         |
| neck pain                      | 2*                        | 1*                        | 0                         |
| itching, urticaria             | 1                         | 1                         | 1                         |
| nausea, chest pain             | 2                         | 0                         | 0                         |
| hypotension                    | 1                         | 0                         | 0                         |
| thoracic congestion, plethora  | 1                         | 0                         | 0                         |
| eye flickering                 | 1                         | 0                         | 0                         |

301 The number of patients presenting with acute symptoms early during the infusion is given.

302 \*one patient from the dose escalation group, all others are from the dose consolidation group.

303 Adverse events possibly related to TLN (Table 4) comprised 46 mild out of normal range measures of  
 304 cholesterol, triglycerides, or apolipoprotein B. These observations were considered possibly related  
 305 to TLN because the study drug contains cholesterol and sphingomyelin. However, lipid assessments  
 306 were performed in a non-fasting state for which no ranges of normality were available. The lipid levels  
 307 of all study participants were fluctuating over the study period but did not consistently change except



308 for HDL cholesterol that was slightly but significantly reduced on all visits compared to baseline (see  
 309 Appendix 2). In one patient, one observation of a slightly elevated level of anti-GM1 IgM antibodies  
 310 was clinically asymptomatic and followed by normal levels in consecutive assessments. Many adverse  
 311 events possibly related to TLN could also be explained as motor (e.g. muscle cramps, tremor,  
 312 dysarthria, dysphagia) or non-motor (e.g., fatigue, sleep disorders, constipation, dysphoria) signs and  
 313 symptoms of PD. During the four weeks pause after the dose escalation phase, one patient reported  
 314 25 adverse events of worsening parkinsonian motor and non-motor problems beyond baseline level.  
 315 This rebound remitted spontaneously to baseline for all reported aspects before TLN was resumed in  
 316 the dose consolidation phase. Mild tension headache, dizziness, nausea, and neck and lumbar pain  
 317 were noted as possible infusion reaction symptoms.

318 **Table 4. Adverse effects possibly related to the study treatment (n=100).**

| Category of adverse events        | n  | System organ class terms                                                                                                              | Preferred terms of grade 2 adverse events |
|-----------------------------------|----|---------------------------------------------------------------------------------------------------------------------------------------|-------------------------------------------|
| Abnormal blood lipids             | 46 | Investigations                                                                                                                        |                                           |
| Elevated anti-GM1-IgM antibodies  | 1  | Investigations                                                                                                                        |                                           |
| Neurologic and psychiatric events | 25 | Nervous system disorders. Psychiatric disorders. Eye disorders. Renal and urinary disorders. Reproductive system and breast disorders |                                           |
| Gastrointestinal disorders        | 7  | Gastrointestinal disorders                                                                                                            | nausea                                    |
| Asthenia and fatigue              | 5  | General disorders and administration site conditions                                                                                  | fatigue                                   |
| Possible infusion reactions       | 7  | Injury, poisoning and procedural                                                                                                      | procedural dizziness                      |

|                          |   |                                                 |               |
|--------------------------|---|-------------------------------------------------|---------------|
|                          |   | complications                                   |               |
| Musculoskeletal problems | 8 | Musculoskeletal and connective tissue disorders | muscle spasms |
| Skin disorders           | 1 | Skin and subcutaneous tissue disorders          |               |

319

320 System organ class terms and preferred terms were used according to the MedDRA coding system for  
 321 adverse effects.

322 Adverse events unlikely related to TLN (table 4) comprised mainly lab results mildly outside of the  
 323 normal range. Two measures of hyperkalaemia (5.5 and 5.8 mmol/l) were clinically asymptomatic and  
 324 occurred without other lab abnormalities; an artefact due to erroneous sample handling was  
 325 assumed. A self-remitting episode of acute vestibular vertigo was the only severe adverse event  
 326 considered unlikely to be related to TLN.

327 **Table 5. Adverse effects unlikely related to the study treatment (n=123).**

| Category of adverse events       | n  | System organ class terms                                                                    | Preferred terms of grade 2 and 3 adverse events |
|----------------------------------|----|---------------------------------------------------------------------------------------------|-------------------------------------------------|
| Out of range laboratory findings | 79 | Blood and lymphatic system disorders. Investigations.<br>Metabolism and nutrition disorders | increased blood potassium, pseudohyperkalemia   |
| Ear, nose and labyrinth disorder | 4  | Ear and labyrinth disorders.<br>Respiratory, thoracic and mediastinal disorders             | acute vestibular syndrome                       |
| Gastrointestinal disorders       | 18 | Gastrointestinal disorders                                                                  | nausea, upper abdominal pain                    |

|                                                 |   |                                                 |                             |
|-------------------------------------------------|---|-------------------------------------------------|-----------------------------|
| Infections and infestations                     | 2 | Infections and infestations                     | post viral fatigue syndrome |
| Cardiovascular disorders                        | 2 | Cardiac disorders. Eye disorders                | amaurosis fugax             |
| Musculoskeletal and connective tissue disorders | 9 | Musculoskeletal and connective tissue disorders | back pain                   |
| Nervous system and psychiatric disorders        | 8 | Nervous system disorders. Psychiatric disorders | tension headache            |
| Skin and subcutaneous tissue disorders          | 1 | Skin and subcutaneous tissue disorders          |                             |

328 System organ class terms and preferred terms were used according to the MedDRA coding system for  
329 adverse effects.

### 330 **Secondary outcome measures**

331 At an early stage, 1 patient discontinued the study and was removed from the efficacy analysis,  
332 meaning that the present analysis was performed on 11 patients. At the final assessment,  
333 parkinsonian motor signs off medication improved  $6.73 \pm 7.16$  points ( $P_{val} = 0.01$ ) on the MDS-UPDRS  
334 3 assessed after 12 hours of withdrawal of dopaminergic medication (see Table 6). This corresponded  
335 with the observation that pausing medication for the final assessment was much better tolerated than  
336 at baseline. With medication (on state), no significant change in motor signs was found during the  
337 study. TLN treatment did not result in a consistent and clinically relevant immediate beneficial effect  
338 on parkinsonian motor signs (data not shown). Motor complications of dopaminergic treatment (MDS-  
339 UPDRS 4) did not change significantly during the study. There were fewer non-motor symptoms at  
340 follow-up compared to baseline as assessed with the NMS-Quest (8.64 vs. 4.63,  $P_{val} = 0.009$ ). Non-  
341 motor parkinsonian symptoms (MDS-UPDRS 1) and activities of daily living in the best condition (MDS-  
342 UPDRS 2 best) were significantly improved at follow-up compared to baseline (mean difference from  
343 baseline -1.91,  $p_{val} = 0.057$  and -2.82,  $p_{val} = 0.02$ ; respectively).

344 The total MDS-UPDRS (including the MDS-UPDRS 2 in the worst condition and the MDS-UPDRS 3 off  
345 medication) improved by  $11.1 \pm 10.47$  from baseline to follow-up (pval = 0.006).

346 Quality of life related to PD as measured with the PDQ39-SI improved by  $2.91 \pm 2.25$  (pval = 0.005),  
347 mainly driven by an improvement of quality of life for activities of daily living. The other subdomains  
348 of the PDQ39 did not improve significantly. No significant change in mood (BDI), motivation (Starkstein  
349 Apathy Scale), overall cognition (MoCA), and dopaminergic medication (levodopa equivalent daily  
350 dose [LEDD]) was observed.

351 During dose-escalation, one patient reported a general effect of well-being and more energy that  
352 lasted longer with increasing doses up to 1 week with GM1 720 mg. All patients reported mild to  
353 moderate reduction of the previously perceived beneficial effects during the month between the last  
354 infusion and the follow-up safety assessment. No lasting worsening beyond baseline was observed  
355 after one month's withdrawal of TLN. In the first three patients, total GM1 dose was resumed at 720  
356 mg weekly after a month's pause following dose escalation; within one or two infusions the previous  
357 level of well-being was re-attained. All patients emphatically requested to prolong TLN treatment at  
358 the end of the study. An amendment for study prolongation was therefore submitted.

359 Table 6. Motor signs and non-motor symptoms, quality of life, and LEDD for the 11 patients.

| Assessment (n=11)   | Baseline Mean±SD | Follow-up Mean±SD | Mean Change from Baseline Mean±SD | Baseline Median (min,max) | Follow-up Median (min,max) | Median change from baseline (min,max) | p-value (Wilcoxon) |
|---------------------|------------------|-------------------|-----------------------------------|---------------------------|----------------------------|---------------------------------------|--------------------|
| MDS-UPDRS 1         | 7.82±4.92        | 5.91±4.11         | -1.91±2.66                        | 6.00 (2.00, 17.00)        | 7.00 (1.00, 13.00)         | -2.00 (-5.00, 4.00)                   | 0.057              |
| MDS-UPDRS 2 best    | 8.00±6.91        | 5.18±7.22         | <b>-2.82±3.34</b>                 | 7.00 (0.00, 23.00)        | 3.00 (0.00, 21.00)         | <b>-2.00 (-9.00, 1.00)</b>            | <b>0.017</b>       |
| MDS-UPDRS 2 worst   | 8.18±7.36        | 6.45±7.55         | -1.73±3.98                        | 7.00 (0.00, 25.00)        | 3.00 (0.00, 22.00)         | -1.00 (-9.00, 6.00)                   | 0.122              |
| MDS-UPDRS 3 off     | 16.09±8.32       | 9.36±5.55         | <b>-6.73±7.16</b>                 | 17.00 (6.00, 36.00)       | 8.00 (1.00, 19.00)         | <b>-7.00 (-24.00, 2.00)</b>           | <b>0.009</b>       |
| MDS-UPDRS 3 on      | 6.45±3.42        | 6.00±4.98         | -0.45±3.42                        | 5.00 (2.00, 12.00)        | 5.00 (1.00, 17.00)         | -1.00 (-6.00, 5.00)                   | 0.561              |
| MDS-UPDRS 4         | 2.18±3.52        | 1.45±3.30         | -0.73±1.10                        | 1.00 (0.00, 12.00)        | 0.00 (0.00, 11.00)         | 0.00 (-3.00, 0.00)                    | 0.098              |
| MDS-UPDRS total     | 34.27±21.79      | 23.18±16.86       | <b>-11.09±10.47</b>               | 29.00 (10.00, 90.00)      | 16.00 (5.00, 58.00)        | <b>-5.00 (-32.00, 0.00)</b>           | <b>0.006</b>       |
| NMS-Quest           | 8.64±3.98        | 4.36±3.29         | <b>-4.27±3.29</b>                 | 8.00 (2.00, 15.00)        | 5.00 (1.00, 10.00)         | <b>-5.00 (-9.00, 0.00)</b>            | <b>0.009</b>       |
| MoCA                | 28.18±1.33       | 27.45±2.16        | -0.73±2.00                        | 29.00 (26.00, 30.00)      | 28.00 (24.00, 30.00)       | -1.00 (-4.00, 3.00)                   | 0.255              |
| PDQ39-Summary index | 20.11±8.32       | 17.21±7.02        | <b>-2.91±2.25</b>                 | 16.25 (9.69, 33.91)       | 15.52 (9.17, 28.65)        | <b>-2.92 (-6.30, 1.77)</b>            | <b>0.005</b>       |

|                           |              |             |                   |                     |                     |                             |              |
|---------------------------|--------------|-------------|-------------------|---------------------|---------------------|-----------------------------|--------------|
| PDQ39 activities of daily | 15.91±13.41  | 8.71±9.21   | <b>-7.20±8.35</b> | 12.50 (0.00, 33.33) | 4.17 (0.00, 25.00)  | <b>-4.17 (-20.83, 4.17)</b> | <b>0.035</b> |
| PDQ39 bodily              | 34.85±17.41  | 30.30±18.36 | -4.55±12.00       | 41.67 (0.00, 58.33) | 33.33 (0.00, 58.33) | 0.00 (-25.00, 16.66)        | 0.309        |
| PDQ39 cognitive           | 22.73±18.39  | 19.32±13.24 | -3.41±15.65       | 25.00 (0.00, 56.25) | 18.75 (0.00, 50.00) | 0.00 (-37.50, 12.50)        | 0.518        |
| PDQ39 communication       | 18.18±22.92  | 21.97±27.46 | 3.79±12.00        | 8.33 (0.00, 66.67)  | 16.67 (0.00, 75.00) | 0.00 (-16.67, 25.00)        | 0.339        |
| PDQ39 mobility            | 12.05±7.40   | 8.86±7.93   | -3.18±6.90        | 12.50 (2.50, 22.50) | 5.00 (0.00, 22.50)  | -2.50 (-15.00, 10.00)       | 0.066        |
| PDQ39 social support      | 12.12±10.78  | 7.58±6.93   | -4.55±8.63        | 8.33 (0.00, 33.33)  | 8.33 (0.00, 16.67)  | 0.00 (-25.00, 8.34)         | 0.203        |
| PDQ39 stigma              | 20.45±17.48  | 21.59±20.98 | 1.14±6.14         | 12.50 (0.00, 50.00) | 18.75 (0.00, 62.50) | 0.00 (-6.25, 12.50)         | 0.588        |
| PDQ39 emotional           | 24.62±17.33  | 19.32±12.54 | -5.30±12.37       | 20.83 (0.00, 58.33) | 16.67 (8.33, 41.67) | -4.17 (-29.16, 8.33)        | 0.332        |
| Epworth Sleepiness        | 7.73±5.20    | 7.82±4.85   | 0.09±3.96         | 6.00 (3.00, 19.00)  | 8.00 (1.00, 16.00)  | 0.00 (-7.00, 8.00)          | >0.999       |
| Beck Depression           | 10.55±4.27   | 9.27±5.20   | -1.27±3.77        | 10.00 (4.00, 19.00) | 8.00 (3.00, 21.00)  | 0.00 (-7.00, 4.00)          | 0.257        |
| Starkstein Apathy Scale   | 11.64±4.90   | 12.00±4.29  | 0.36±2.98         | 12.00 (3.00, 19.00) | 10.00 (4.00, 18.00) | 1.00 (-4.00, 6.00)          | 0.822        |
| LEDD                      | 745.91±330.5 | 754.09±327. | 8.18±23.69        | 750.00 (340.00,     | 750.00 (340.00,     | 0.00 (-10.00, 75.00)        | 0.423        |

## 361 **Discussion**

362 In this open phase I clinical safety trial 12 PD patients received weekly infusions with liposomal GM1  
363 for 8 to 22 weeks. Tolerability was overall very good with no or mild unspecific adverse reactions to  
364 the infusion. Some fatigue and dizziness occurred repeatedly in some but not all patients after the  
365 infusion and lasted for a few hours, so a causal link to TLN seems probable. However, there were acute  
366 infusion reactions in 7 of the 12 patients at the 2nd, 3rd, or 4th exposure to TLN. The intensity was  
367 mild to moderate and in one case severe leading to exclusion from further study treatment. These  
368 reactions were most pronounced at second exposure, consisted mostly of neck and lumbar back pain,  
369 and swiftly abated within minutes after TLN infusions were paused. An allergic IgE-mediated  
370 anaphylactic reaction seems highly unlikely as re-exposure did not lead to reappearance of the  
371 symptoms but to habituation. Moreover, tryptase was measured before and after an acute infusion  
372 reaction with urticaria at the 3rd exposure in one patient and remained stable in the normal range.  
373 We therefore considered a complement activation related pseudo-allergy (CARPA) to the liposome as  
374 an explanation for the acute infusion reactions (23). However, CARPAs typically occur with the first  
375 exposure and habituate thereafter, whereas in our patients the first exposure was unproblematic in  
376 all 12 patients. Moreover, the clinical manifestation of CARPAs is not typically reported as back pain  
377 which was the main manifestation in our patients. The occurrence of the acute infusion reaction only  
378 at the 2nd administration is suggestive of a sensitization to TLN, however, the unproblematic tolerance  
379 of re-exposure makes autoantibodies to GM1 an unlikely explanation, especially as anti-GM1-IgM  
380 levels remained normal throughout the study in these patients and did not increase. Although we  
381 cannot explain the mechanism of the observed acute infusion reactions, slowing the infusion rate and  
382 possibly progressively increasing doses over the first weeks of treatment with TLN seem to prevent  
383 such reactions. Free GM1 has been administered intravenously for over three decades in several  
384 neurological disorders for up to 2500 mg/d without observing acute infusion reactions (24). In  
385 particular in the randomized placebo-controlled trial with subcutaneous free GM1 patients received

386 a single intravenous loading dose of 1000 mg GM1. The subsequent subcutaneous administration of  
387 GM1 in this study was a route of administration with a much higher risk of triggering an allergic  
388 reaction to GM1 than intravenous administration, but no allergic side effects were reported.  
389 Therefore, we suspect the acute infusion reactions in our patients to be related to the liposomal  
390 carrier of GM1. Further analyses of possible mechanisms for an acute reaction to TLN are ongoing  
391 outside of this trial. Other safety assessments of TLN will include lab analyses of blood samples drawn  
392 after potential further acute infusion reactions to assess tryptase, thromboxanes, complement  
393 factors, activation of factor XII, and measures of basophile activation. However, we try to completely  
394 avoid further adverse reactions of this nature by gradually increasing the dose of TLN over the first  
395 weeks and by starting the speed of infusion at a very low rate and ramping up as tolerated, especially  
396 for the 2nd and 3rd administration of TLN.

397 Although hyperlipidemia was present in some of our patients already at baseline, there was no  
398 consistent increase of lipid levels throughout the trial as had been observed with the administration  
399 of very high doses of free GM1 previously (24). Hyperlipidemia was likely overestimated in our patients  
400 as blood was drawn in non-fasting conditions. However, HDL cholesterol was slightly but significantly  
401 lowered under TLN treatment which may consist in a vascular risk factor. There were no adverse  
402 events related to atherosclerosis in this study, but the observation period was very short. For more  
403 conclusive results, lipid levels must be assessed systematically and under standardized fasting  
404 conditions in patients treated with TLN in future studies.

405 Although this is an uncontrolled phase I safety trial, we gathered exploratory data on the possible  
406 therapeutic effects of TLN as a basis for power calculations for a therapeutic trial. In terms of PD  
407 symptoms, all patients felt stable or better over the study period. Improvements of sleep quality,  
408 motivation, sense of smell, and overall energy were reported, gradually occurring over several weeks.  
409 The drug withdrawal for the second levodopa challenge test was much better tolerated by most  
410 patients than the first, and several participants reported that accidental omission of a dose of



411 levodopa was much less perceived than before the treatment with TLN. These encouraging  
412 observations are reflected in an improvement of non-motor (MDS-UPDRS-1, NMS-Quest) and motor  
413 aspects of experiences of daily living (MDS-UPDRS-2), and of parkinsonian motor signs (MDS-UPDRS-  
414 3) resulting in an improvement of disease-related quality of life (PDQ-39). The observed improvements  
415 of the MDS-UPDRS-1 and MDS-UPDRS-2 of 1.91 and 2.82 points are below the minimal clinically  
416 relevant difference of 2.64 and 3.05 for these scales (25). However, for the motor signs, the minimal  
417 clinical improvement on the MDS-UPDRS-3 has been suggested at 3.5 points (26), and our patients  
418 improved by 6.73 points. The minimal clinically relevant improvement on the MDS-UPDRS total score  
419 has been estimated at 7.1 points (27), whereas our patients improved by 11.09 points. However, for  
420 disease-related quality of life measured by the PDQ-39 the minimal clinically important improvement  
421 of 4.72% (28) is not reached with 2.9% observed in our patients. These exploratory observations are  
422 encouraging, especially as they uniformly point towards an improvement on different established  
423 scales despite a very small number of patients. The observed improvements occurred gradually over  
424 the study period. No immediate effect on motor signs was found in the ratings before and after TLN  
425 infusions. A rapid symptomatic beneficial effect of TLN on parkinsonian signs and symptoms is  
426 therefore most unlikely. Moreover, as there was no selection of patients based on minimum disease  
427 severity, regression to the mean is unlikely to explain the observed improvement in this study. If there  
428 is indeed a therapeutic effect of TLN, either a long-term symptomatic effect or a disease-modifying  
429 effect seems possible. As the annual progression of PD in its natural course has been estimated at 5.05  
430 points in the untreated and 2.13 points in the treated condition for the sum of the MDS-UPDRS-2 and  
431 -3 (29), the observed improvement among our patients may point to a long-term symptomatic or even  
432 a neurorestorative effect. Indeed, GM1 can stabilize alpha-synuclein (7) and has a neurorestorative  
433 effect on neurons in animal models of PD (30). Suffering neurons in patients with PD may therefore  
434 be rescued by GM1 treatment, and a liposomal formulation may be an effective approach to deliver  
435 GM1 into the central and peripheral nervous system. This may explain a gradual and long-lasting  
436 reparative effect of TLN despite its short plasma half-life of 12.6h. However, all this remains

437 speculative at present. As this trial is not designed to show a therapeutic effect of TLN given the open  
438 design without placebo control, a placebo effect may explain the observed improvements. An  
439 adequately powered randomized placebo-controlled trial of TLN in PD is needed to further explore  
440 this promising new treatment.

## 441 **Acknowledgments**

442 MedDRA® trademark is registered by ICH.

## 443 References

- 444 1. Postuma RB, Berg D, Stern M, Poewe W, Olanow CW, Oertel W, et al. MDS clinical  
445 diagnostic criteria for Parkinson's disease. *Mov Disord* [Internet]. 2015 Oct 1 [cited  
446 2023 Jun 20];30(12):1591–601. Available from:  
447 <https://pubmed.ncbi.nlm.nih.gov/26474316/>
- 448 2. Berg D, Borghammer P, Fereshtehnejad SM, Heinzel S, Horsager J, Schaeffer E, et al.  
449 Prodromal Parkinson disease subtypes - key to understanding heterogeneity. *Nat Rev*  
450 *Neurol* [Internet]. 2021 Jun 1 [cited 2023 Jun 20];17(6):349–61. Available from:  
451 <https://pubmed.ncbi.nlm.nih.gov/33879872/>
- 452 3. Braak H, Del Tredici K, Rüb U, De Vos RAI, Jansen Steur ENH, Braak E. Staging of brain  
453 pathology related to sporadic Parkinson's disease. *Neurobiol Aging* [Internet]. 2003  
454 Mar [cited 2023 Jun 20];24(2):197–211. Available from:  
455 <https://pubmed.ncbi.nlm.nih.gov/12498954/>
- 456 4. Rietdijk CD, Perez-Pardo P, Garssen J, van Wezel RJA, Kraneveld AD. Exploring Braak's  
457 Hypothesis of Parkinson's Disease. *Front Neurol* [Internet]. 2017 Feb 13 [cited 2023  
458 Jun 20];8(FEB). Available from: <https://pubmed.ncbi.nlm.nih.gov/28243222/>
- 459 5. McFarthing K, Rafaloff G, Baptista M, Mursaleen L, Fuest R, Wyse RK, et al. Parkinson's  
460 Disease Drug Therapies in the Clinical Trial Pipeline: 2022 Update. *J Parkinsons Dis*  
461 [Internet]. 2022 [cited 2023 Jun 20];12(4):1073–82. Available from:  
462 <https://pubmed.ncbi.nlm.nih.gov/35527571/>
- 463 6. te Vrugte D, Sturchio A, Priestman DA, Tsitsi P, Hertz E, Andréasson M, et al.  
464 Glycosphingolipid Changes in Plasma in Parkinson's Disease Independent of  
465 Glucosylceramide Levels. *Mov Disord* [Internet]. 2022 Oct 1 [cited 2023 Jun  
466 20];37(10):2129–34. Available from: <https://pubmed.ncbi.nlm.nih.gov/35876461/>
- 467 7. Sonnino S. The relationship between depletion of brain GM1 ganglioside and  
468 Parkinson's disease. *FEBS Open Bio* [Internet]. 2023 [cited 2023 Jun 20]; Available  
469 from: <https://pubmed.ncbi.nlm.nih.gov/36638010/>
- 470 8. Chowdhury S, Ledeen R. The Key Role of GM1 Ganglioside in Parkinson's Disease.  
471 *Biomolecules* [Internet]. 2022 Jan 21 [cited 2023 Jun 20];12(2). Available from:  
472 <https://pubmed.ncbi.nlm.nih.gov/35204675/>
- 473 9. Schneider JS, Pope A, Simpson K, Taggart J, Smith MG, DiStefano L. Recovery from  
474 experimental parkinsonism in primates with GM1 ganglioside treatment. *Science*  
475 [Internet]. 1992 [cited 2023 Jun 20];256(5058):843–6. Available from:  
476 <https://pubmed.ncbi.nlm.nih.gov/1350379/>
- 477 10. Schneider JS, Gollomp SM, Sendek S, Colcher A, Cambi F, Du W, et al. A Randomized,  
478 Controlled, Delayed Start Trial of GM1 Ganglioside in Treated Parkinson's Disease  
479 Patients Jay. *J Neurol Sci* [Internet]. 2013;324(1–2):140–8. Available from:  
480 <http://dx.doi.org/10.1016/j.jns.2012.10.024>
- 481 11. Schneider JS, Gollomp SM, Sendek S, Colcher A, Cambi F, Du W. A randomized,  
482 controlled, delayed start trial of GM1 ganglioside in treated Parkinson's disease

- 483 patients. J Neurol Sci [Internet]. 2013 Jan 15 [cited 2023 Jun 20];324(1–2):140–8.  
484 Available from: <https://pubmed.ncbi.nlm.nih.gov/23199590/>
- 485 12. Hughes AJ, Daniel SE, Kilford L, Lees AJ. Accuracy of clinical diagnosis of idiopathic  
486 Parkinson’s disease: a clinico-pathological study of 100 cases. J Neurol Neurosurg  
487 Psychiatry [Internet]. 1992 [cited 2023 Jun 20];55(3):181–4. Available from:  
488 <https://pubmed.ncbi.nlm.nih.gov/1564476/>
- 489 13. Hoehn MM, Yahr MD. Parkinsonism: onset, progression and mortality. Neurology  
490 [Internet]. 1967 [cited 2023 Jun 20];17(5):427–42. Available from:  
491 <https://pubmed.ncbi.nlm.nih.gov/6067254/>
- 492 14. Nasreddine ZS, Phillips NA, Bédirian V, Charbonneau S, Whitehead V, Collin I, et al. The  
493 Montreal Cognitive Assessment, MoCA: a brief screening tool for mild cognitive  
494 impairment. J Am Geriatr Soc [Internet]. 2005 [cited 2023 Jun 20];53(4):695–9.  
495 Available from: <https://pubmed.ncbi.nlm.nih.gov/15817019/>
- 496 15. Goetz CG, Tilley BC, Shaftman SR, Stebbins GT, Fahn S, Martinez-Martin P, et al.  
497 Movement Disorder Society-sponsored revision of the Unified Parkinson’s Disease  
498 Rating Scale (MDS-UPDRS): scale presentation and clinimetric testing results. Mov  
499 Disord [Internet]. 2008 Nov 15 [cited 2023 Jun 20];23(15):2129–70. Available from:  
500 <https://pubmed.ncbi.nlm.nih.gov/19025984/>
- 501 16. Nyholm D, Jost WH. An updated calculator for determining levodopa-equivalent dose.  
502 Neurol Res Pract [Internet]. 2021 Dec 1 [cited 2023 Jun 20];3(1). Available from:  
503 <https://pubmed.ncbi.nlm.nih.gov/34689840/>
- 504 17. Chaudhuri KR, Martinez-Martin P, Schapira AHV, Stocchi F, Sethi K, Odin P, et al.  
505 International multicenter pilot study of the first comprehensive self-completed  
506 nonmotor symptoms questionnaire for Parkinson’s disease: the NMSQuest study. Mov  
507 Disord [Internet]. 2006 [cited 2023 Jun 20];21(7):916–23. Available from:  
508 <https://pubmed.ncbi.nlm.nih.gov/16547944/>
- 509 18. Peto V, Jenkinson C, Fitzpatrick R, Greenhall R. The development and validation of a  
510 short measure of functioning and well being for individuals with Parkinson’s disease.  
511 Qual Life Res [Internet]. 1995 Jun [cited 2023 Jun 20];4(3):241–8. Available from:  
512 <https://pubmed.ncbi.nlm.nih.gov/7613534/>
- 513 19. Johns MW. A new method for measuring daytime sleepiness: the Epworth sleepiness  
514 scale. Sleep [Internet]. 1991 [cited 2023 Jun 20];14(6):540–5. Available from:  
515 <https://pubmed.ncbi.nlm.nih.gov/1798888/>
- 516 20. Nasreddine ZS, Phillips NA, Bédirian V, Charbonneau S, Whitehead V, Collin I, et al. The  
517 Montreal Cognitive Assessment, MoCA: a brief screening tool for mild cognitive  
518 impairment. J Am Geriatr Soc [Internet]. 2005 [cited 2023 Jun 20];53(4):695–9.  
519 Available from: <https://pubmed.ncbi.nlm.nih.gov/15817019/>
- 520 21. Beck AT, Ward CH, Mendelson M, Mock J, Erbaugh J. An inventory for measuring  
521 depression. Arch Gen Psychiatry [Internet]. 1961 [cited 2023 Jun 20];4(6):561–71.  
522 Available from: <https://pubmed.ncbi.nlm.nih.gov/13688369/>
- 523 22. Starkstein SE, Mayberg HS, Preziosi TJ, Andrezejewski P, Leiguarda R, Robinson RG.  
524 Reliability, validity, and clinical correlates of apathy in Parkinson’s disease. J

- 525 Neuropsychiatry Clin Neurosci [Internet]. 1992 [cited 2023 Jun 20];4(2):134–9.  
526 Available from: <https://pubmed.ncbi.nlm.nih.gov/1627973/>
- 527 23. Szebeni J, Simberg D, González-Fernández Á, Barenholz Y, Dobrovolskaia MA.  
528 Roadmap and strategy for overcoming infusion reactions to nanomedicines. Nat  
529 Nanotechnol [Internet]. 2018 Dec 1 [cited 2023 Jun 20];13(12):1100–8. Available from:  
530 <https://pubmed.ncbi.nlm.nih.gov/30348955/>
- 531 24. Roberts JW, Hoeg JM, Maral Mouradian M, Linfante I, Chase TN. Iatrogenic  
532 hyperlipidaemia with GM1 ganglioside. Lancet [Internet]. 1993 Jul 10 [cited 2023 Jun  
533 20];342(8863):115. Available from: <https://pubmed.ncbi.nlm.nih.gov/8100881/>
- 534 25. Horváth K, Aschermann Z, Kovács M, Makkos A, Harmat M, Janszky J, et al. Minimal  
535 clinically important differences for the experiences of daily living parts of movement  
536 disorder society-sponsored unified Parkinson’s disease rating scale. Mov Disord  
537 [Internet]. 2017 May 1 [cited 2023 Jun 20];32(5):789–93. Available from:  
538 <https://pubmed.ncbi.nlm.nih.gov/28218413/>
- 539 26. Horváth K, Aschermann Z, Ács P, Deli G, Janszky J, Komoly S, et al. Minimal clinically  
540 important difference on the Motor Examination part of MDS-UPDRS. Parkinsonism  
541 Relat Disord [Internet]. 2015 Dec 1 [cited 2023 Jun 20];21(12):1421–6. Available from:  
542 <https://pubmed.ncbi.nlm.nih.gov/26578041/>
- 543 27. Makkos A, Kovács M, Aschermann Z, Harmat M, Janszky J, Karádi K, et al. Are the  
544 MDS-UPDRS-Based Composite Scores Clinically Applicable? Mov Disord [Internet].  
545 2018 May 1 [cited 2023 Jun 20];33(5):835–9. Available from:  
546 <https://pubmed.ncbi.nlm.nih.gov/29488318/>
- 547 28. Horváth K, Aschermann Z, Kovács M, Makkos A, Harmat M, Janszky J, et al. Changes in  
548 Quality of Life in Parkinson’s Disease: How Large Must They Be to Be Relevant?  
549 Neuroepidemiology [Internet]. 2017 Jun 1 [cited 2023 Jun 20];48(1–2):1–8. Available  
550 from: <https://pubmed.ncbi.nlm.nih.gov/28161701/>
- 551 29. Latourelle JC, Beste MT, Hadzi TC, Miller RE, Oppenheim JN, Valko MP, et al. Large-  
552 scale identification of clinical and genetic predictors of motor progression in patients  
553 with newly diagnosed Parkinson’s disease: a longitudinal cohort study and validation.  
554 Lancet Neurol [Internet]. 2017 Nov 1 [cited 2023 Jun 20];16(11):908–16. Available  
555 from: <https://pubmed.ncbi.nlm.nih.gov/28958801/>
- 556 30. Schneider JS, Aras R, Williams CK, Koprach JB, Brotchie JM, Singh V. GM1 Ganglioside  
557 Modifies  $\alpha$ -Synuclein Toxicity and is Neuroprotective in a Rat  $\alpha$ -Synuclein Model of  
558 Parkinson’s Disease. Sci Rep [Internet]. 2019 Dec 1 [cited 2023 Jun 20];9(1). Available  
559 from: <https://pubmed.ncbi.nlm.nih.gov/31182727/>

560

561

## 562 Supporting information

### 563 S1 Checklist. Transparent Reporting of Evaluations with Nonrandomized Designs (TREND)

564 statement checklist.

565

### 566 S2 Text. Clinical trial protocol.

567

### 568 Appendix 1 Laboratory analysis list

569 Sodium, potassium, calcium, phosphate, creatinine, urea, albumin, total protein, cystatin C, lactate

570 dehydrogenase, ferritin, HbA1c, ALT, AST, total bilirubin, pancreatic amylase, alkaline phosphatase,

571 cholesterol (total, LDL, HDL), apolipoprotein B, differentiated red and white blood cell count,

572 thrombocytes, ganglioside GM1 IgG antibodies

### 573 Appendix 2: Observed lab values and weekly change

| Variable                   | Week                         | Median (min,max)    | Median change from Baseline (min, max) | p-value (Wilcoxon) | Mean (SD)    | Mean change from Baseline (SD) |
|----------------------------|------------------------------|---------------------|----------------------------------------|--------------------|--------------|--------------------------------|
| Total cholesterol (mmol/L) | Baseline (week 1 assessment) | 5.81 (4.20, 6.27)   | -                                      | -                  | 5.44 (0.71)  | -                              |
|                            | Week 2                       | 5.64 (3.79, 6.14)   | -0.13 (-0.89, 0.40)                    | 0.398              | 5.32 (0.84)  | -0.12 (0.37)                   |
|                            | Week 3                       | 5.35 (3.83, 6.35)   | -0.09 (-0.85, 0.69)                    | 0.577              | 5.36 (0.89)  | -0.08 (0.48)                   |
|                            | Week 4                       | 5.15 (3.90, 6.62)   | -0.34 (-1.44, 0.67)                    | 0.147              | 5.13 (0.86)  | -0.31 (0.59)                   |
|                            | Week 5                       | 5.25 (3.80, 6.46)   | -0.13 (-0.88, 0.54)                    | 0.240              | 5.27 (0.90)  | -0.18 (0.44)                   |
|                            | Week 6                       | 5.56 (3.80, 6.18)   | -0.25 (-0.66, 0.36)                    | 0.056              | 5.23 (0.83)  | -0.21 (0.32)                   |
|                            | Week 7                       | 5.61 (3.85, 6.80)   | -0.15 (-0.83, 0.88)                    | 0.533              | 5.40 (0.92)  | -0.05 (0.43)                   |
|                            | Week 8                       | 5.78 (3.96, 6.58)   | 0.03 (-0.50, 0.61)                     | 0.638              | 5.50 (0.89)  | 0.05 (0.34)                    |
|                            | Final Assessment             | 5.48 (4.05, 6.56)   | 0.10 (-0.41, 0.64)                     | 0.700              | 5.50 (0.85)  | 0.05 (0.40)                    |
| LDL cholesterol (mmol/L)   | Baseline (week 1 assessment) | 3.44 (2.46, 4.22)   | -                                      | -                  | 3.35 (0.64)  | -                              |
|                            | Week 2                       | 3.27 (2.00, 4.62)   | -0.12 (-0.84, 0.69)                    | 0.359              | 3.21 (0.87)  | -0.14 (0.46)                   |
|                            | Week 3                       | 3.20 (2.28, 4.74)   | -0.17 (-0.62, 0.88)                    | 0.898              | 3.40 (0.83)  | 0.05 (0.54)                    |
|                            | Week 4                       | 3.10 (1.73, 4.54)   | -0.35 (-0.95, 0.61)                    | 0.147              | 3.09 (0.79)  | -0.26 (0.52)                   |
|                            | Week 5                       | 3.07 (1.90, 4.80)   | -0.11 (-1.00, 0.87)                    | 0.240              | 3.24 (0.90)  | -0.11 (0.46)                   |
|                            | Week 6                       | 3.28 (2.04, 4.12)   | -0.11 (-0.50, 0.47)                    | 0.413              | 3.26 (0.66)  | -0.09 (0.31)                   |
|                            | Week 7                       | 3.72 (1.95, 4.33)   | 0.01 (-0.95, 0.83)                     | 0.898              | 3.36 (0.83)  | 0.01 (0.48)                    |
|                            | Week 8                       | 3.50 (1.73, 4.41)   | 0.05 (-1.12, 0.61)                     | 0.898              | 3.27 (0.89)  | -0.08 (0.56)                   |
|                            | Final Assessment             | 3.72 (1.94, 4.57)   | 0.25 (-0.55, 0.89)                     | 0.240              | 3.55 (0.75)  | 0.20 (0.51)                    |
| HDL cholesterol (mmol/L)   | Baseline (week 1 assessment) | 1.22 (0.90, 2.76)   | -                                      | -                  | 1.35 (0.50)  | -                              |
|                            | Week 2                       | 1.08 (0.72, 2.47)   | -0.14 (-0.29, -0.05)                   | 0.004              | 1.20 (0.45)  | -0.15 (0.07)                   |
|                            | Week 3                       | 1.13 (0.79, 2.59)   | -0.16 (-0.27, -0.02)                   | <0.001             | 1.19 (0.49)  | -0.16 (0.07)                   |
|                            | Week 4                       | 1.05 (0.72, 2.23)   | -0.18 (-0.53, -0.10)                   | <0.001             | 1.14 (0.40)  | -0.21 (0.12)                   |
|                            | Week 5                       | 1.09 (0.70, 2.24)   | -0.18 (-0.52, -0.05)                   | <0.001             | 1.15 (0.40)  | -0.20 (0.13)                   |
|                            | Week 6                       | 1.04 (0.72, 2.20)   | -0.18 (-0.56, -0.10)                   | 0.004              | 1.11 (0.39)  | -0.24 (0.15)                   |
|                            | Week 7                       | 0.97 (0.72, 2.53)   | -0.23 (-0.39, 0.00)                    | 0.006              | 1.13 (0.50)  | -0.22 (0.11)                   |
|                            | Week 8                       | 1.13 (0.72, 2.52)   | -0.18 (-0.36, 0.05)                    | 0.005              | 1.18 (0.48)  | -0.17 (0.10)                   |
|                            | Final Assessment             | 1.14 (0.76, 2.41)   | -0.14 (-0.35, 0.09)                    | 0.021              | 1.21 (0.44)  | -0.13 (0.14)                   |
| Follow up                  | 1.14 (0.77, 2.45)            | -0.11 (-0.34, 0.05) | 0.008                                  | 1.22 (0.44)        | -0.13 (0.12) |                                |

|                                         |                                    |                   |                     |        |             |              |
|-----------------------------------------|------------------------------------|-------------------|---------------------|--------|-------------|--------------|
| Triglycerides<br>(mmol/L)               | Baseline<br>(week 1<br>assessment) | 1.54 (0.59, 2.71) | -                   | -      | 1.64 (0.71) | -            |
|                                         | Week 2                             | 1.44 (0.82, 3.60) | 0.37 (-0.81, 1.56)  | 0.123  | 2.00 (1.13) | 0.35 (0.69)  |
|                                         | Week 3                             | 1.77 (0.72, 2.90) | 0.09 (-0.94, 1.10)  | 0.563  | 1.71 (0.75) | 0.06 (0.58)  |
|                                         | Week 4                             | 1.35 (0.64, 4.52) | 0.05 (-0.60, 2.98)  | 0.625  | 1.99 (1.22) | 0.35 (1.04)  |
|                                         | Week 5                             | 1.89 (0.70, 3.03) | 0.23 (-0.76, 1.29)  | 0.175  | 1.92 (0.79) | 0.28 (0.62)  |
|                                         | Week 6                             | 1.72 (0.82, 3.26) | 0.08 (-0.17, 1.59)  | 0.130  | 1.92 (0.81) | 0.28 (0.50)  |
|                                         | Week 7                             | 2.05 (1.15, 4.85) | 0.44 (-0.46, 2.14)  | 0.042  | 2.24 (1.11) | 0.59 (0.80)  |
|                                         | Week 8                             | 2.13 (0.78, 4.47) | 0.31 (-0.62, 2.99)  | 0.102  | 2.29 (1.32) | 0.65 (1.08)  |
|                                         | Final<br>Assessment                | 1.45 (0.54, 2.98) | -0.18 (-1.38, 0.67) | 0.765  | 1.61 (0.71) | -0.03 (0.59) |
|                                         | Follow up                          | 1.12 (0.61, 2.95) | -0.20 (-1.62, 1.21) | 0.320  | 1.49 (0.79) | -0.15 (0.69) |
| Apolipoprotein<br>B<br>(g/L)            | Baseline<br>(week 1<br>assessment) | 0.91 (0.71, 1.11) | -                   | -      | 0.94 (0.13) | 0.00 (0.00)  |
|                                         | Week 2                             | 0.83 (0.66, 1.13) | 0.02 (-0.25, 0.08)  | >0.999 | 0.92 (0.17) | -0.02 (0.10) |
|                                         | Week 3                             | 0.87 (0.70, 1.16) | 0.02 (-0.21, 0.11)  | 0.638  | 0.94 (0.16) | 0.01 (0.09)  |
|                                         | Week 4                             | 0.88 (0.74, 1.20) | 0.02 (-0.17, 0.09)  | >0.999 | 0.93 (0.16) | -0.01 (0.09) |
|                                         | Week 5                             | 0.94 (0.72, 1.24) | 0.02 (-0.19, 0.22)  | 0.126  | 0.97 (0.18) | 0.03 (0.10)  |
|                                         | Week 6                             | 0.96 (0.74, 1.18) | 0.06 (-0.17, 0.15)  | 0.240  | 0.98 (0.16) | 0.04 (0.10)  |
|                                         | Week 7                             | 1.01 (0.74, 1.22) | 0.08 (-0.17, 0.30)  | 0.036  | 1.02 (0.16) | 0.08 (0.12)  |
|                                         | Week 8                             | 1.08 (0.80, 1.32) | 0.10 (-0.11, 0.27)  | 0.032  | 1.04 (0.17) | 0.11 (0.13)  |
|                                         | Final<br>Assessment                | 1.12 (0.88, 1.38) | 0.14 (-0.03, 0.27)  | 0.008  | 1.07 (0.16) | 0.14 (0.11)  |
|                                         | Follow up                          | 0.96 (0.79, 1.25) | 0.04 (-0.13, 0.19)  | 0.168  | 0.98 (0.14) | 0.05 (0.10)  |
| Total/HDL<br>cholesterol<br>(mmol/mmol) | Baseline<br>(week 1<br>assessment) | 4.42 (2.14, 5.15) | -                   | -      | 4.29 (0.84) | -            |
|                                         | Week 2                             | 4.85 (2.49, 5.85) | 0.50 (-0.57, 1.14)  | 0.024  | 4.72 (1.06) | 0.43 (0.46)  |
|                                         | Week 3                             | 5.28 (2.38, 5.96) | 0.55 (-0.18, 1.54)  | 0.002  | 4.83 (1.02) | 0.53 (0.41)  |
|                                         | Week 4                             | 4.87 (2.59, 6.09) | 0.39 (-0.20, 1.67)  | 0.010  | 4.78 (1.06) | 0.48 (0.55)  |
|                                         | Week 5                             | 5.05 (2.53, 6.15) | 0.57 (-0.45, 1.43)  | 0.010  | 4.85 (1.06) | 0.55 (0.53)  |
|                                         | Week 6                             | 5.24 (2.64, 6.39) | 0.49 (-0.11, 2.04)  | 0.002  | 4.99 (1.06) | 0.70 (0.58)  |
|                                         | Week 7                             | 5.35 (2.69, 6.73) | 0.79 (0.21, 2.11)   | <0.001 | 5.15 (1.05) | 0.86 (0.49)  |
|                                         | Week 8                             | 5.25 (2.54, 6.08) | 0.54 (-0.01, 1.86)  | 0.002  | 4.99 (1.01) | 0.70 (0.55)  |
|                                         | Final<br>Assessment                | 4.99 (2.72, 6.13) | 0.55 (-0.47, 1.51)  | 0.010  | 4.80 (0.96) | 0.51 (0.55)  |
|                                         | Follow up                          | 4.57 (2.23, 5.82) | 0.08 (-0.36, 1.40)  | 0.365  | 4.52 (1.08) | 0.22 (0.58)  |

574
